# Supplementary material for: Digital Decision Support for Medication-Related Osteonecrosis of the Jaw–Related Dental Anxiety: An Explanatory Sequential Mixed Methods Study
Source: Research Square preprint supplement (doi:10.21203/rs.3.rs-8858353/v1), 2026-02-16
Supplement: Supplementary file 1 [file 1a2178691c3c3d424e9d5082.docx]

**Supplemet Attachment**

Content Summary and Usage Steps Web Application "Dental Confidence: Dental Confidence for Osteoporosis Patients"

1. Introduction and Objectives of the Application The "Dental Confidence" web application is an innovation developed for this study. Its primary objective is to help assess initial risks and provide advice to osteoporosis patients undergoing medication treatment, in order to:

- Reduce **Anticipatory Anxiety** of patients when they need to undergo dental treatment.
- Provide correct information and guidelines according to international standards (AAOMS 2022).
- On the **Welcome Screen**, a **Disclaimer** is clearly stated that this app is **"not a diagnosis"** and **"cannot replace"** consultation with a physician or dentist.

2. User Flow & Content The application is designed with risk assessment logic based on AAOMS 2022 guidelines, consisting of the following main steps for the patient to answer:

Step 1: Medication Type Identification Patients will be asked what type of medication they are currently using. The main options include:

- Bisphosphonate (Oral)
- Bisphosphonate (Injection)
- Denosumab (Injection, e.g., Prolia)
- Romosozumab (Injection, e.g., Evenity)
- Teriparatide (Injection, e.g., Forteo)
- Not sure

Step 2: Duration of Use Identification The application uses **Conditional Logic** depending on the answer in Step 1.

- **Case 1:** If "Bisphosphonate (Oral)" is selected , the app will ask for the duration of use (e.g., "Less than 4 years" or "4 years or more").
- **Case 2:** If "Bisphosphonate (Injection)" is selected , the app will ask for the duration of use (e.g., "Less than 4 years" or "4 years or more").
- **Other cases:** Such as Denosumab, will skip to the next step.

Step 3: Co-morbid Risk Factors Assessment Patients will be asked about 2 key risk factors according to AAOMS guidelines:

- Concomitant use of Steroids
- Use of Anti-angiogenesis medications (e.g., certain cancer drugs)

Step 4: Summary & Recommendation Page The crucial part is the processing section. The app will process all answers and display a "Recommendation Summary" categorized by risk level (e.g., "Low Risk" or "High Risk").

- **Recommendation Content:** Provides "Safe" and "Neutral" information based on AAOMS 2022.
- **Example (Low Risk):** "You can proceed with dental procedures as usual, but must always inform your dentist beforehand."
- **Example (High Risk):** "You should consult both your physician and dentist to plan treatment together. It may be necessary to... (e.g., temporarily discontinue medication at the physician's discretion)."

3. Additional Feature The application also includes an additional tool: **"Prolia (Denosumab) Injection Date Counter"** to help patients plan and track their next injection schedule appropriately.

4. Key Messages for Patients All content in the application (especially on the summary page) emphasizes 3 main points for maximum patient safety:

- **Do not stop medication yourself:** "Please do not stop medication... on your own before consulting a physician."
- **Must inform the dentist:** "Always inform your dentist that you are taking this group of osteoporosis medications."
- **The app is only an assistant:** Reiterate that this information is used to reduce anxiety and provide initial knowledge only. Final decisions must be made in conjunction with medical professionals.
